# Supplementary material for: TLR4 endocytosis and endosomal TLR4 signaling are distinct and independent outcomes of TLR4 activation
Source: Springer Nature journal article supplement (doi:10.1038/s44319-025-00444-2), 2025-04-09
Supplement: MOESM12 [file 44319_2025_444_MOESM12_ESM.pdf]

**A** ISOTYPE CTRL LPS TLR4 surface expression (ΔMFI) TLR4 endocytosis

**B** *Ifnb1* *Il1b* Relative gene expression (rel. to *Hprt*)

**C** DMSO DYNASORE *Il1b* *Ifnb1* *Il6* Relative gene expression

**D** *Ifnb1* *Il1b* Relative gene expression

**E** *Ifnb1* *Il1b* Relative gene expression

**F** DMSO FILIPIN DYNASORE PBS MβCD LPS (min): 0 30 60 120 p-TBK1 TBK1 α-tubulin p-TBK1 relative to α-tubulin [A.U.]

(A) Flow cytometric analysis of TLR4 surface expression in WT BMM treated for 60 min with DMSO or dynasore (80  $\mu$ M), followed by stimulation with LPS (100 EU/mL) or left unstimulated (CTRL) for 120 min. (B) qRT-PCR analysis of *Irfn1* and *Irfb* expression in WT BMM treated for 60 min with DMSO or dynasore (80  $\mu$ M), followed by stimulation with LPS (100 EU/mL) for 90 min. (C) qRT-PCR analysis of *Irfb*, *Irfn1* and *Irf6* mRNA expression in WT BMM treated for 60 min with DMSO or dynasore (80  $\mu$ M), followed by stimulation with Pam<sub>2</sub>CSK<sub>4</sub> (10 ng/mL), poly I:C (10  $\mu$ g/mL), flagellin (0.5  $\mu$ g/mL) or CpG DNA (1  $\mu$ M), or left unstimulated (CTRL), for 90 min. (D, E) Impact of TAK-242 (1  $\mu$ M) or MRT67307 (5  $\mu$ M) on LPS-induced (D) *Irfn1* and (E) *Irfb* expression (90 min) in WT BMM treated with filipin (5  $\mu$ M), M $\beta$ CD (10 mM), or DMSO as control. (F) Time-course of LPS-induced TBK1 phosphorylation in WT BMM treated with filipin, M $\beta$ CD, dynasore or DMSO as solvent control. Data information: Flow cytometry histograms and immunoblot images depict 1 representative of  $n = 3$  biological replicates generated in independent experiments. Bar plots are mean  $\pm$  SEM of  $n = 3-4$  biological replicates generated in independent experiments indicated as data points. Unpaired two-tailed  $t$  test performed in (A-C); ordinary two-way ANOVA with Dunnett's multiple comparison test utilized in (D-F); \* $P < 0.05$ ; \*\* $P < 0.01$ ; \*\*\* $P < 0.001$ , \*\*\*\* $P < 0.0001$ , ns = not significant. Source data are available online for this figure.

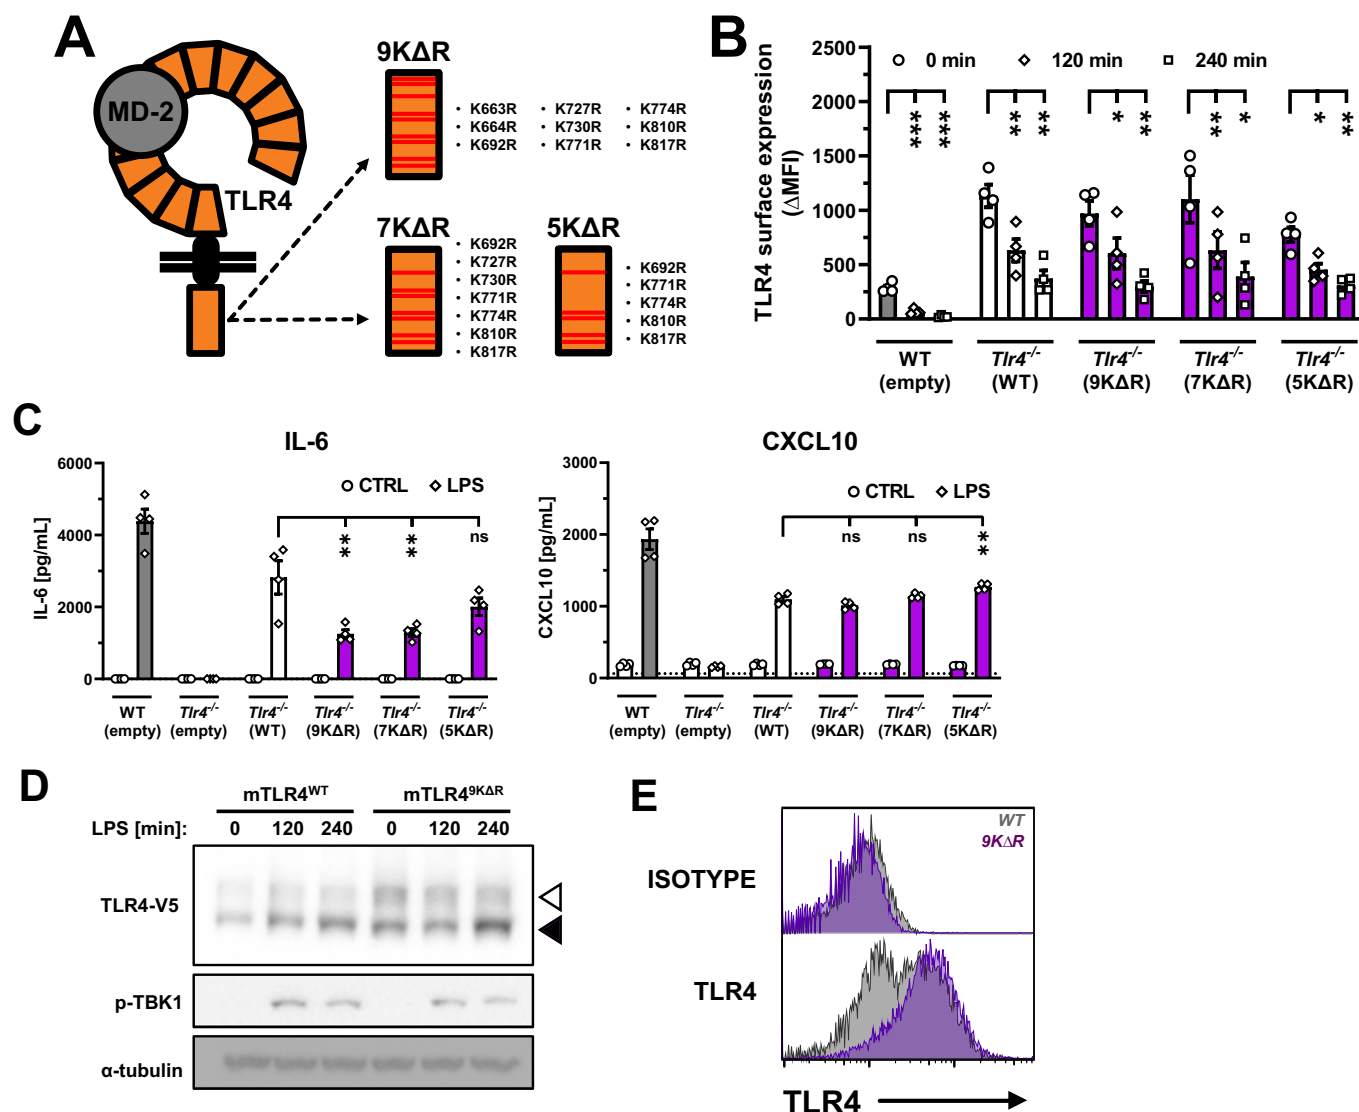

**Figure EV2.** Lysine residues in the TLR4 TIR domain were not required for LPS-induced TLR4 endocytosis.

(A–C) *Tlr4*<sup>-/-</sup> BMMs retrovirally reconstituted with (A) mTLR4<sup>WT</sup>, mTLR4<sup>9KΔR</sup>, mTLR4<sup>7KΔR</sup>, mTLR4<sup>5KΔR</sup> or empty vector were stimulated with LPS (100 EU/mL); (B) TLR4 surface expression assessed at 120 and 240 min post-stimulation and (C) IL-6 and CXCL10 production assessed at 24 h post-stimulation. (D, E) RAW<sup>TLR4ko</sup> cells were stably transfected with V5-tagged constructs of mTLR4<sup>WT</sup> or mTLR4<sup>9KΔR</sup>. (D) Total cellular expression of TLR4-V5 during LPS stimulation (100 EU/mL, 0, 120, 240 min) was assessed via immunoblot. Phospho-TBK1 served as control for cellular activation; α-tubulin served as loading control. Black arrow head indicates low glycosylated intracellular TLR4, white arrow head indicates highly-glycosylated cell surface-expressed TLR4. (E) TLR4 surface expression was assessed in resting cells via flow cytometry. Data information: Immunoblot images depict 1 representative of *n* = 3 biological replicates generated in independent experiments. Flow cytometry histogram represents cells post sorting. Bar plots are mean ± SEM of *n* = 3–4 biological replicates generated in independent experiments indicated as data points. RM two-way ANOVA with Dunnett's multiple comparisons test utilized in (B). Ordinary one-way ANOVA with Dunnett's multiple comparisons test utilized in (C). \**P* < 0.05; \*\**P* < 0.01; \*\*\**P* < 0.001, \*\*\*\**P* < 0.0001, ns = not significant. Source data are available online for this figure.

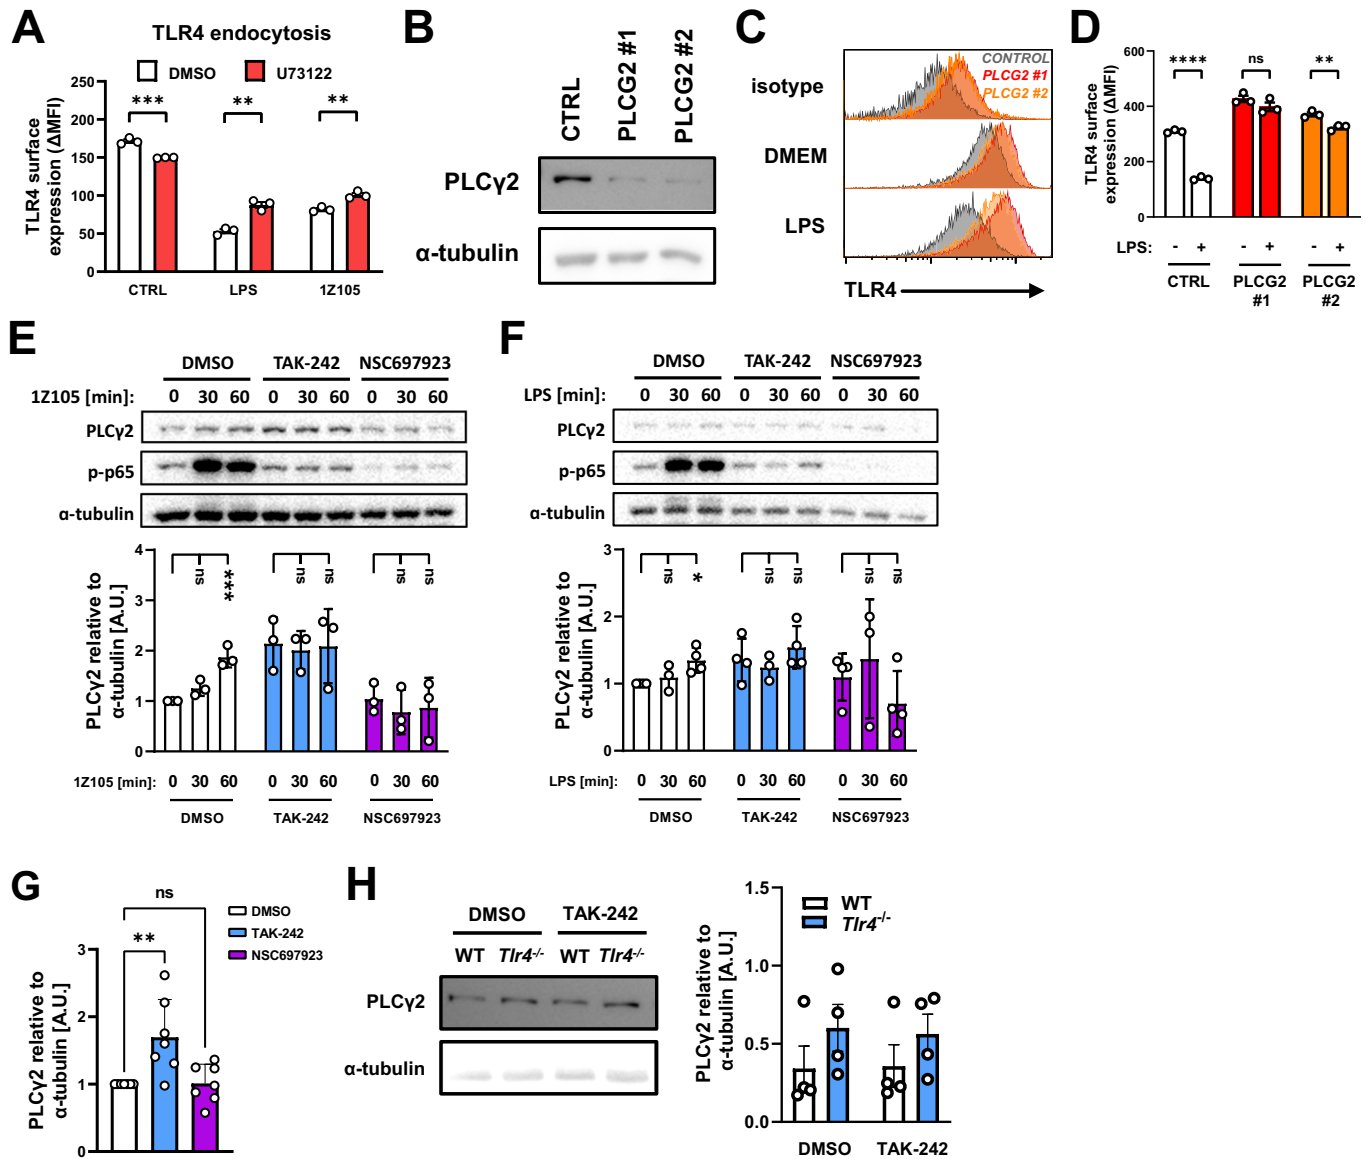

**Figure EV3. PLCγ2 regulates TLR4 endocytosis.**

(A) Impact of PLC inhibitor (U73122, 10 μM) on LPS- (100 EU/mL) and 1Z105-induced (10 μM) TLR4 endocytosis (120 min) in WT BMM. (B–D) CRISPR/Cas9-mediated knockdown of PLCγ2 expression in WT BMM (B) was verified by immunoblot analysis, and (C, D) shown to impair LPS-induced (100 EU/mL, 120 min) TLR4 endocytosis as assessed by flow cytometry. (E, F) Immunoblot analysis of the impact of TAK-242 (1 μM) or NSC694923 (10 μM) on total PLCγ2, phosphorylated NF-κB p65 and α-tubulin in WT BMM upon stimulation with (C) 1Z105 (10 μM) or (D) LPS (100 EU/mL) for the indicated times. (G) Comparison of PLCγ2 expression in unstimulated cells presented in (E, F). (H) Immunoblot analysis of PLCγ2 cellular expression in WT and *Tlr4*<sup>-/-</sup> BMM treated with DMSO or TAK-242 (1 μM) for 120 min. Data information: Flow cytometry histograms and immunoblot images depict 1 representative of  $n = 3$ –4 biological replicates generated in independent experiments. Bar plots are mean  $\pm$  SEM of  $n = 3$ –7 biological replicates generated in independent experiments indicated as data points. Unpaired two-tailed  $t$  test utilized in (A, D). Ordinary one-way ANOVA with Dunnett's multiple comparisons test utilized in (E–G). \* $P < 0.05$ ; \*\* $P < 0.01$ ; \*\*\* $P < 0.001$ ; \*\*\*\* $P < 0.0001$ ; ns = not significant. Source data are available online for this figure.
